# Supplementary material
Source: PubMed Central journal article supplement (PMC3507366)
Supplement: ASN.2012040383_ASN2012040383SupplementaryData.pdf [file ASN.2012040383_ASN2012040383SupplementaryData.pdf]

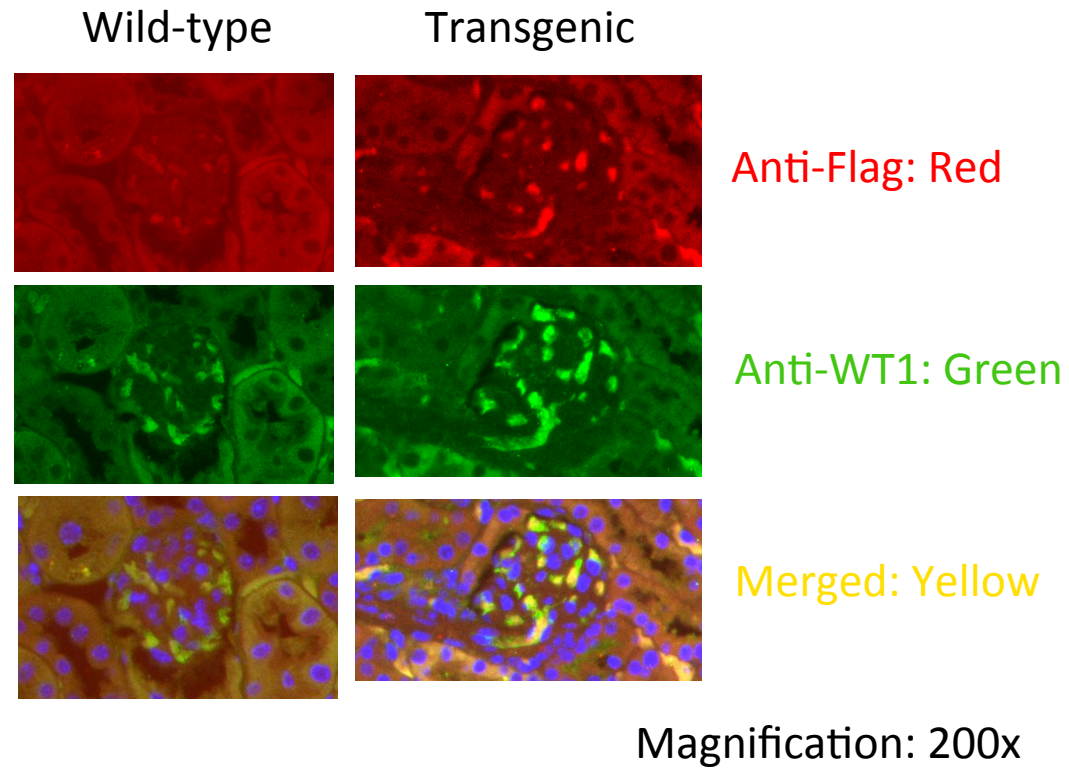

Figure S1: Expression of Flag-hVDR in WT1-positive podocytes in Tg mice, not in WT mice. Kidney sections were co-stained with anti-Flag and anti-WT1 antibodies.
